# Supplementary material for: In vivo mapping of the chemical exchange relayed nuclear Overhauser effect using deep magnetic resonance fingerprinting
Source: PubMed Central journal article supplement (PMC11576397; doi:10.1016/j.isci.2024.111209), 2024-10-21
Supplement: mmc1.pdf [file mmc1.pdf]

iScience, Volume 27

## **Supplemental information**

***In vivo* mapping of the chemical exchange relayed  
nuclear Overhauser effect using deep magnetic  
resonance fingerprinting**

**Inbal Power, Michal Rivlin, Hagar Shmuely, Moritz Zaiss, Gil Navon, and Or Perlman**

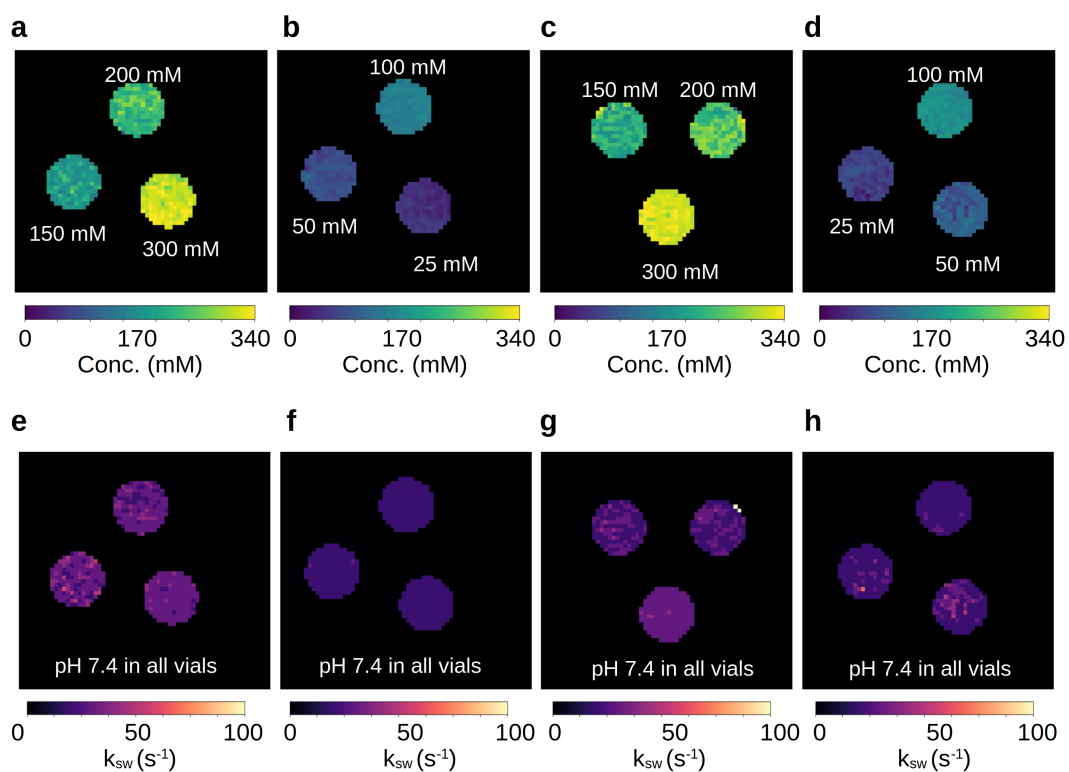

**Supporting Information Fig. S1. In vitro quantification of NOE proton exchange parameters using dot-product MRF. (a-d) Glucose-unit concentration and (e-h) NOE proton exchange rate maps of bovine (a,b,e,f) and rabbit (c,d,g,h) liver phantoms. The white text next to each vial represents the ground truth.**

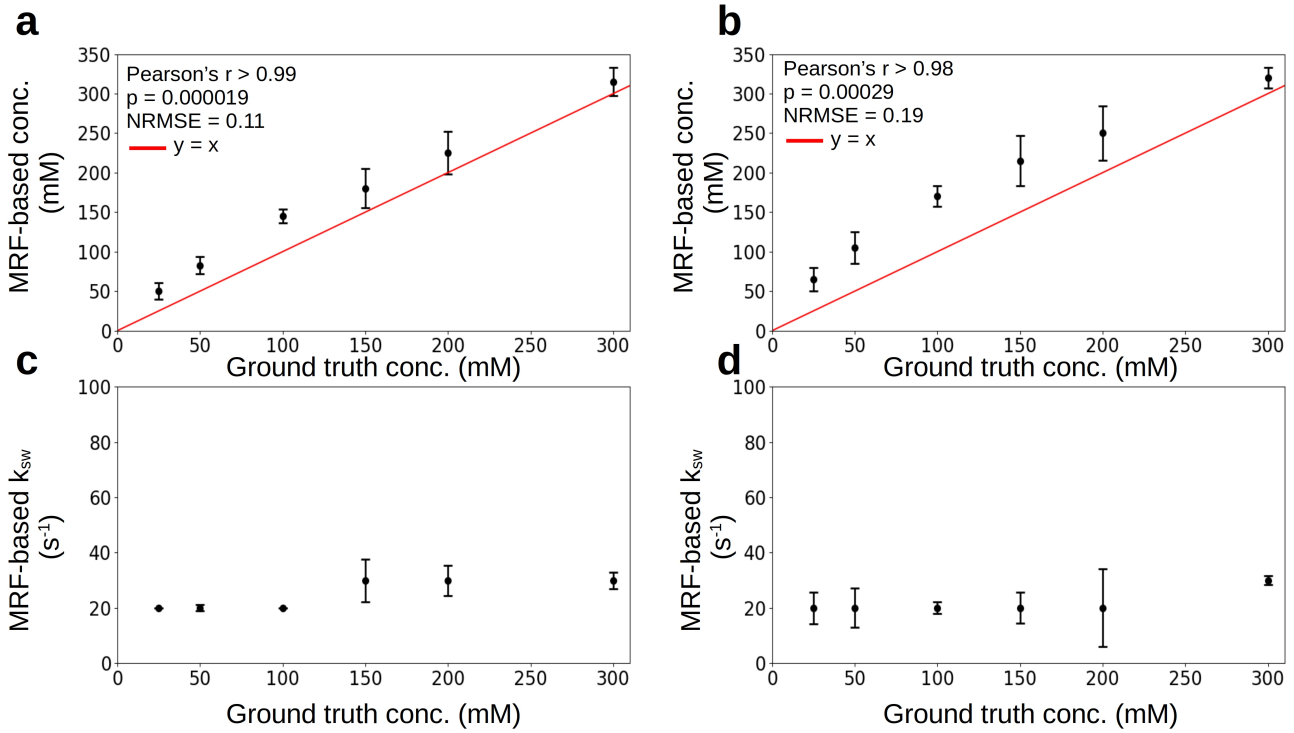

**Supporting Information Fig. S2. Statistical analysis of the quantitative proton exchange parameters obtained in-vitro using dot-product matching.** MRF determined glucose-unit concentrations in bovine (a) and rabbit (b) liver phantoms were significantly correlated (Pearson's  $r > 0.98$ ,  $p < 0.001$ ) with known concentrations. (c-d) The NOE MRF determined proton exchange rates for the same phantoms. The black circles represent the mean and the bars represent the standard deviation.

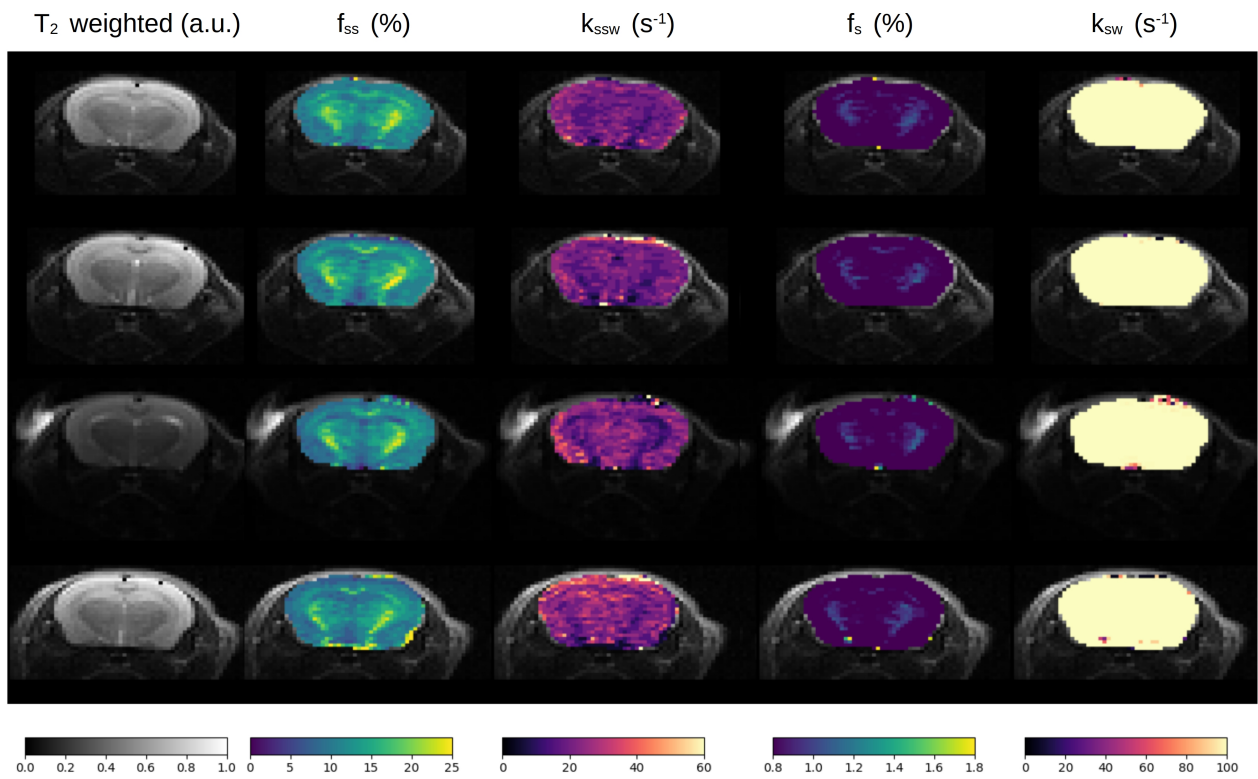

**Supporting Information Fig. S3. Quantitative semisolid MT ( $f_{ss}$ ,  $k_{ssw}$ ) and rNOE ( $f_s$ ,  $k_{sw}$ ) parameter maps obtained using dot-product matching in four representative mice, alongside an anatomical  $T_2$ -weighted image.**

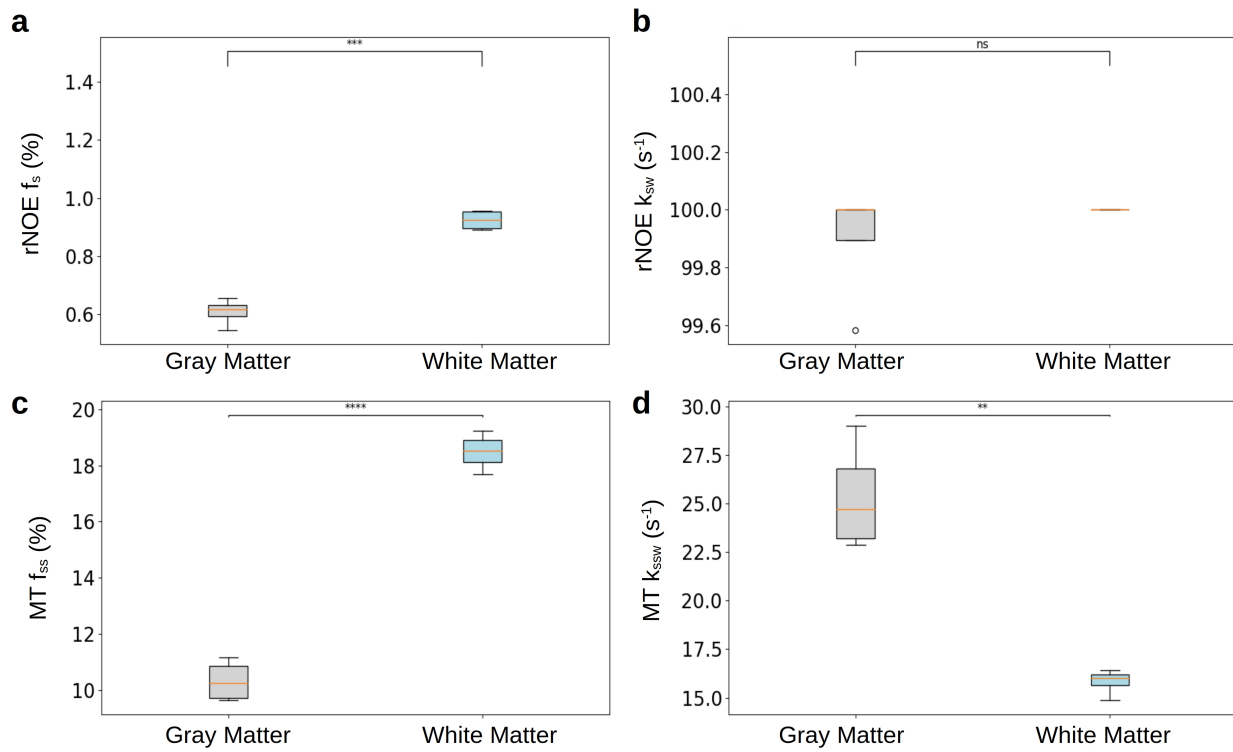

**Supporting Information Fig. S4. Statistical analysis of the semisolid MT and rNOE proton volume fraction ( $f_{ss}$ ,  $f_s$ ) and exchange rate ( $k_{ssw}$ ,  $k_{sw}$ ) parameters extracted from in vivo mice brains (n=7) using dot-product matching. Note the false classification of the rNOE  $k_{sw}$  (fixed at the maximum value available in the dictionary). \*\*p<0.01, \*\*\*p<0.001, \*\*\*\*p<0.0001, ns = not significant.**

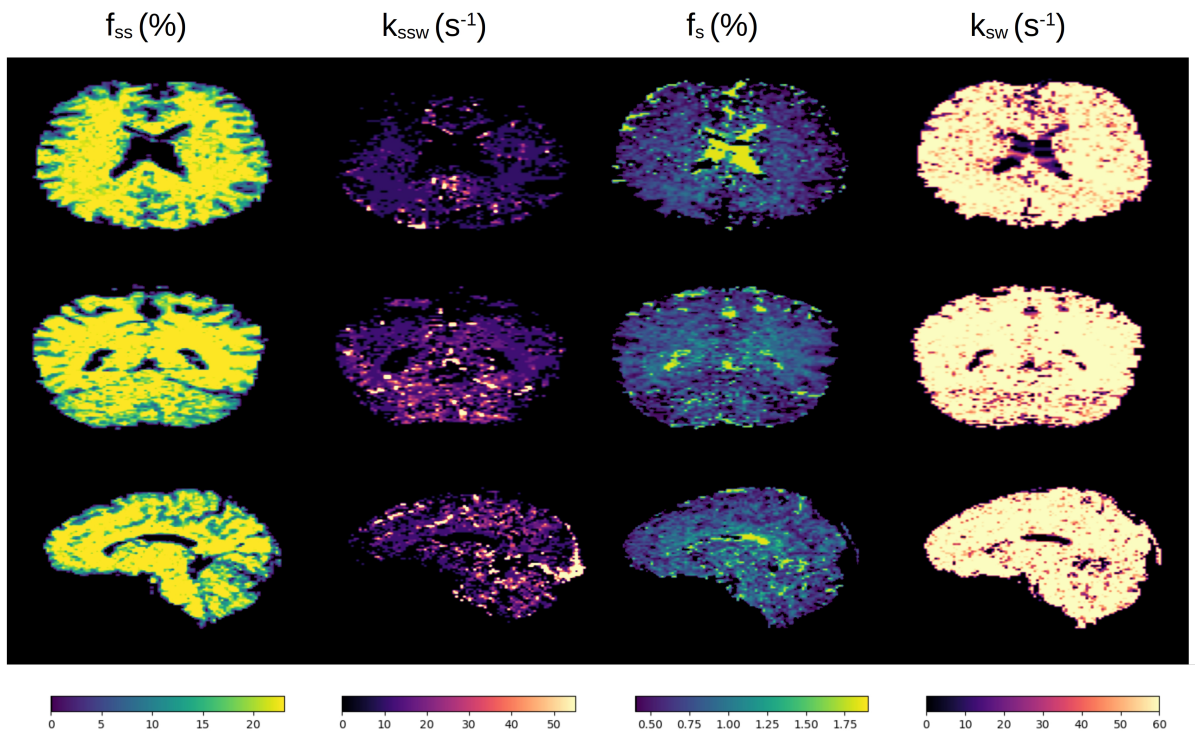

**Supporting Information Fig. S5. Quantitative semisolid MT and rNOE proton volume fraction ( $f_{ss}$  and  $f_s$ , respectively) and exchange rate ( $k_{ssw}$  and  $k_{sw}$ , respectively) parameter maps obtained from a representative human volunteer using dot-product matching. (Top) Representative axial slice. (Center) Representative coronal slice. (Bottom) Representative sagittal slice.**

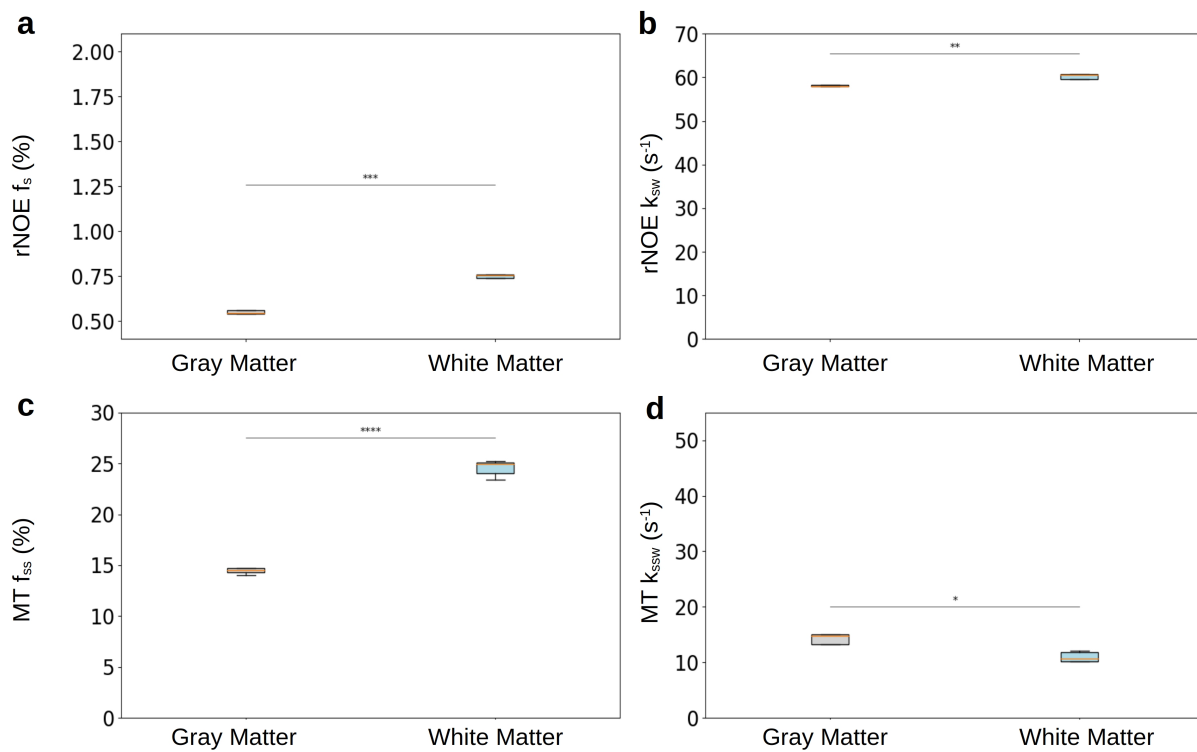

**Supporting Information Fig. S6. Statistical analysis of the semisolid MT and rNOE proton volume fraction ( $f_{ss}$ ,  $f_s$ ) and exchange rate ( $k_{ssw}$ ,  $k_{sw}$ ) parameters extracted from in vivo human volunteer brains (n=5) using dot-product matching. \* $p < 0.05$ , \*\* $p < 0.01$ , \*\*\* $p < 0.001$ , \*\*\*\* $p < 0.0001$ .**

**Supporting Information Table S1. Acquisition parameters used.**

| BSA / In Vivo Mice rNOE                  |                                                                                 |     |     |     |     |     |     |     |     |     |     |     |     |     |     |     |     |     |     |     |     |     |     |     |     |     |     |     |     |     |   |
|------------------------------------------|---------------------------------------------------------------------------------|-----|-----|-----|-----|-----|-----|-----|-----|-----|-----|-----|-----|-----|-----|-----|-----|-----|-----|-----|-----|-----|-----|-----|-----|-----|-----|-----|-----|-----|---|
| <b>B<sub>1</sub></b><br>( $\mu$ T)       | 2                                                                               | 2   | 1.7 | 1.5 | 1.2 | 1.2 | 3   | 0.5 | 3   | 1   | 2.2 | 3.2 | 1.5 | 0.7 | 1.5 | 2.2 | 2.5 | 1.2 | 3   | 0.2 | 1.5 | 2.5 | 0.7 | 4   | 3.2 | 3.5 | 1.5 | 2.7 | 0.7 | 0.5 |   |
| <b><math>\omega_{rf}</math></b><br>(ppm) | -3.5                                                                            |     |     |     |     |     |     |     |     |     |     |     |     |     |     |     |     |     |     |     |     |     |     |     |     |     |     |     |     |     |   |
| <b>T<sub>sat</sub></b><br>(s)            | 2.5                                                                             |     |     |     |     |     |     |     |     |     |     |     |     |     |     |     |     |     |     |     |     |     |     |     |     |     |     |     |     |     |   |
| <b>T<sub>rec</sub></b><br>(s)            | 1                                                                               |     |     |     |     |     |     |     |     |     |     |     |     |     |     |     |     |     |     |     |     |     |     |     |     |     |     |     |     |     |   |
| <b>FA</b><br>( $^{\circ}$ )              | 90                                                                              |     |     |     |     |     |     |     |     |     |     |     |     |     |     |     |     |     |     |     |     |     |     |     |     |     |     |     |     |     |   |
| Glycogen Phantoms rNOE                   |                                                                                 |     |     |     |     |     |     |     |     |     |     |     |     |     |     |     |     |     |     |     |     |     |     |     |     |     |     |     |     |     |   |
| <b>B<sub>1</sub></b><br>( $\mu$ T)       | .26                                                                             | .08 | .46 | .01 | .07 | .02 | .09 | .45 | .09 | .02 | .03 | .42 | .23 | .11 | .16 | 0   | .38 | .02 | .09 | .18 | .31 | .33 | .38 | .11 | .03 | .25 | .03 | .18 | .27 | .42 |   |
| <b><math>\omega_{rf}</math></b><br>(ppm) | -1                                                                              |     |     |     |     |     |     |     |     |     |     |     |     |     |     |     |     |     |     |     |     |     |     |     |     |     |     |     |     |     |   |
| <b>T<sub>sat</sub></b><br>(s)            | 1                                                                               |     |     |     |     |     |     |     |     |     |     |     |     |     |     |     |     |     |     |     |     |     |     |     |     |     |     |     |     |     |   |
| <b>T<sub>rec</sub></b><br>(s)            | 3                                                                               |     |     |     |     |     |     |     |     |     |     |     |     |     |     |     |     |     |     |     |     |     |     |     |     |     |     |     |     |     |   |
| <b>FA</b><br>( $^{\circ}$ )              | 90                                                                              |     |     |     |     |     |     |     |     |     |     |     |     |     |     |     |     |     |     |     |     |     |     |     |     |     |     |     |     |     |   |
| In Vivo Mice MT                          |                                                                                 |     |     |     |     |     |     |     |     |     |     |     |     |     |     |     |     |     |     |     |     |     |     |     |     |     |     |     |     |     |   |
| <b>B<sub>1</sub></b><br>( $\mu$ T)       | 2                                                                               | 2   | 1.7 | 1.5 | 1.2 | 1.2 | 3   | 0.5 | 3   | 1   | 2.2 | 3.2 | 1.5 | 0.7 | 1.5 | 2.2 | 2.5 | 1.2 | 3   | 0.2 | 1.5 | 2.5 | 0.7 | 4   | 3.2 | 3.5 | 1.5 | 2.7 | 0.7 | 0.5 |   |
| <b><math>\omega_{rf}</math></b><br>(ppm) | 8                                                                               | 6   | 6   | 10  | 10  | 10  | 8   | 6   | 8   | 14  | 14  | 10  | 6   | 10  | 8   | 6   | 8   | 10  | 14  | 14  | 6   | 8   | 14  | 6   | 14  | 14  | 14  | 14  | 8   | 10  | 8 |
| <b>T<sub>sat</sub></b><br>(s)            | 2.5                                                                             |     |     |     |     |     |     |     |     |     |     |     |     |     |     |     |     |     |     |     |     |     |     |     |     |     |     |     |     |     |   |
| <b>T<sub>rec</sub></b><br>(s)            | 1                                                                               |     |     |     |     |     |     |     |     |     |     |     |     |     |     |     |     |     |     |     |     |     |     |     |     |     |     |     |     |     |   |
| <b>FA</b><br>( $^{\circ}$ )              | 90                                                                              |     |     |     |     |     |     |     |     |     |     |     |     |     |     |     |     |     |     |     |     |     |     |     |     |     |     |     |     |     |   |
| Human Subjects Semisolid MT              |                                                                                 |     |     |     |     |     |     |     |     |     |     |     |     |     |     |     |     |     |     |     |     |     |     |     |     |     |     |     |     |     |   |
| <b>B<sub>1</sub></b><br>( $\mu$ T)       | 2                                                                               | 2   | 1.7 | 1.5 | 1.2 | 1.2 | 3   | 0.5 | 3   | 1   | 1   | 2.2 | 3.2 | 1.5 | 0.7 | 2.2 | 2.5 | 1.2 | 3   | 0.2 | 1.5 | 2.5 | 0.7 | 4   | 3.2 | 3.5 | 1.5 | 2.7 | 0.7 | 0.5 |   |
| <b><math>\omega_{rf}</math></b><br>(ppm) | 8                                                                               | 6   | 6   | 10  | 10  | 10  | 8   | 6   | 8   | 14  | 14  | 10  | 6   | 10  | 8   | 8   | 10  | 14  | 14  | 6   | 8   | 14  | 6   | 14  | 14  | 14  | 14  | 8   | 10  | 8   |   |
| <b>T<sub>sat</sub></b><br>(s)            | A saturation pulse train of 13 rectangular pulses, 100 ms "on", 50% duty cycle. |     |     |     |     |     |     |     |     |     |     |     |     |     |     |     |     |     |     |     |     |     |     |     |     |     |     |     |     |     |   |
| <b>T<sub>rec</sub></b><br>(s)            | 1                                                                               |     |     |     |     |     |     |     |     |     |     |     |     |     |     |     |     |     |     |     |     |     |     |     |     |     |     |     |     |     |   |
| <b>FA</b><br>( $^{\circ}$ )              | 15                                                                              |     |     |     |     |     |     |     |     |     |     |     |     |     |     |     |     |     |     |     |     |     |     |     |     |     |     |     |     |     |   |
| Human Subjects rNOE                      |                                                                                 |     |     |     |     |     |     |     |     |     |     |     |     |     |     |     |     |     |     |     |     |     |     |     |     |     |     |     |     |     |   |
| <b>B<sub>1</sub></b><br>( $\mu$ T)       | 2                                                                               | 2   | 1.7 | 1.5 | 1.2 | 1.2 | 3   | 0.5 | 3   | 1   | 2.2 | 3.2 | 1.5 | 0.7 | 1.5 | 2.2 | 2.5 | 1.2 | 3   | 0.2 | 1.5 | 2.5 | 0.7 | 4   | 3.2 | 3.5 | 1.5 | 2.7 | 0.7 | 0.5 |   |
| <b><math>\omega_{rf}</math></b><br>(ppm) | -3.5                                                                            |     |     |     |     |     |     |     |     |     |     |     |     |     |     |     |     |     |     |     |     |     |     |     |     |     |     |     |     |     |   |
| <b>T<sub>sat</sub></b><br>(s)            | A saturation pulse train of 13 rectangular pulses, 100 ms "on", 50% duty cycle. |     |     |     |     |     |     |     |     |     |     |     |     |     |     |     |     |     |     |     |     |     |     |     |     |     |     |     |     |     |   |
| <b>T<sub>rec</sub></b><br>(s)            | 1                                                                               |     |     |     |     |     |     |     |     |     |     |     |     |     |     |     |     |     |     |     |     |     |     |     |     |     |     |     |     |     |   |
| <b>FA</b><br>( $^{\circ}$ )              | 15                                                                              |     |     |     |     |     |     |     |     |     |     |     |     |     |     |     |     |     |     |     |     |     |     |     |     |     |     |     |     |     |   |

B<sub>1</sub> = Saturation pulse power (average amplitude);  $\omega_{rf}$  = saturation pulse frequency offset; T<sub>sat</sub> = saturation pulse duration; T<sub>rec</sub> = recovery time; FA = flip angle.



**Supporting Information Table S2. Quantitative in vivo exchange parameters obtained in this study and previous literature.**

| Proton pool                                 | Semisolid MT |                 |                 |                           | rNOE                      |              |              |                          |
|---------------------------------------------|--------------|-----------------|-----------------|---------------------------|---------------------------|--------------|--------------|--------------------------|
|                                             | Parameter    | WM $f_{ss}$ (%) | GM $f_{ss}$ (%) | WM $k_{SSW}$ ( $s^{-1}$ ) | GM $k_{SSW}$ ( $s^{-1}$ ) | WM $f_s$ (%) | GM $f_s$ (%) | WM $k_{sw}$ ( $s^{-1}$ ) |
| This study (mice)                           | 15.00±0.34   | 9.20±0.75       | 36.06±1.64      | 43.55±2.00                | 1.49±0.06                 | 0.99±0.2     | 67.51±0.41   | 53.50±4.21               |
| This study (humans)                         | 11.28±1.50   | 5.44±0.54       | 22.20±1.57      | 29.19±0.93                | 1.43±0.07                 | 1.15±0.08    | 41.46±1.15   | 37.46±1.79               |
| Samsanov et al., 2012 <sup>34</sup> (dogs)  | 12.1±0.4     | 5.4±0.2         | 21.05±0.5       | 30.09±1.1                 |                           |              |              |                          |
| Stanisz et al., 2005 <sup>31</sup> (bovine) | 13.9 ±2.8    | 5.0 ±0.5        | 23±4            | 40±1                      |                           |              |              |                          |
| Liu et al., 2013 <sup>32</sup> (humans)     | 6.18±0.43    | 3.43±0.42       | 67.5±6.98       | 63.48±4.5                 | 2.39±0.22                 | 1.18±0.16    | 27.45±2.18   | 24.50±1.65               |
| Geades et al., 2017 <sup>36</sup> (humans)  | 8.9 ± 0.3*   | 4.4 ± 0.4*      |                 |                           | 5 ± 0.1*                  | 3 ± 0.1*     |              |                          |
| Xu et al., 2014 <sup>41</sup> (rats)        |              |                 |                 |                           |                           |              |              | 17                       |
| Jones et al., 2013 <sup>42</sup> (humans)   |              |                 |                 |                           |                           |              | 11           |                          |
| Yarnykh et al., 2015 <sup>33</sup> (humans) | 13.48±0.37   | 5.77±0.34       |                 |                           |                           |              |              |                          |
| Perlman et al., 2022 <sup>29</sup> (mice)   | 19.8±0.5     | 12.8 ± 0.8      | 43.87±2.36      | 56.54±3.1                 |                           |              |              |                          |

WM = white matter. GM = gray matter. f = proton volume fraction. k = proton exchange rate.

\*In the study by Geades et al the  $k_{SSW}$  was restricted to  $50 s^{-1}$  and the  $k_{sw}$  restricted to  $10 s^{-1}$ .

**Supporting Information Table S3. Properties of the MR-fingerprinting dictionaries used for training the deep reconstruction networks.**

| Imaging target                    | Glycogen rNOE (7T) | BSA rNOE (7T)  | Mouse Brain semisolid MT (7T) | Mouse Brain rNOE (7T) | Human Brain semisolid MT (3T) | Human Brain rNOE (3T) |
|-----------------------------------|--------------------|----------------|-------------------------------|-----------------------|-------------------------------|-----------------------|
| Water $T_1$ (ms)                  | [2200, 3205]       | [2600, 4000]   | [1300, 1900]                  | [1425, 1925]          | [800, 3000]                   | [1084, 1820]          |
| Water $T_2$ (ms)                  | [50, 1205]         | [90, 500]      | [40, 90]                      | [45, 95]              | [50, 150]                     | [50, 150]             |
| Semi-solid $T_1$ (ms)             | ---                | ---            | 1000                          | 1000                  | Equal to water $T_1$          | 1000                  |
| Semi-solid $T_2$ ( $\mu$ s)       | ---                | ---            | 10**                          | 10**                  | 10**                          | 10**                  |
| $k_{ssw}$ ( $s^{-1}$ )            | ---                | ---            | [5, 100]                      | [7, 102]              | [5, 100]                      | [5, 100]              |
| $f_{ss}$ (%)                      | ---                | ---            | [1.82, 27.27]                 | [3.18, 28.64]         | [1.82, 27.27]                 | [1.82, 27.27]         |
| Semi-solid offset frequency (ppm) | ---                | ---            | -2.5                          | -2.5                  | -2.5                          | -2.5                  |
| Solute $T_1$ (ms)                 | 2600               | 3000           | ---                           | 1300                  | ---                           | 1000                  |
| Solute $T_2$ (ms)                 | 10                 | 0.5            | ---                           | 5                     | ---                           | 5                     |
| $k_{sw}$ ( $s^{-1}$ )             | [20, 140]          | [10, 50]       | ---                           | [7, 102]              | ---                           | [5, 60]               |
| $f_s$ (%)                         | [0, 0.309]         | [0.045, 2.273] | ---                           | [0.114, 1.84]         | ---                           | [0.114, 1.84]         |
| Solute offset frequency (ppm)     | -1                 | -3.5           | ---                           | -3.5                  | ---                           | -3.5                  |
| Number of dictionary entires      | 4,757,688          | 1,394,820      | 12,600                        | 9,828,000             | 531,300                       | 2,574,000             |
| Dictionary generation time***     | 1.5 min            | 20 s           | 1 s                           | 10.77 min             | 5.64 min                      | 119.9 min             |

\*The notation  $[x, z]$  represents the [minimum, maximum] parameter values. Various uniformly sampled values were taken within each parameter range to ultimately yield the total number of dictionary entries specified in the second row from the bottom.

\*\*The Bloch-McConnell equations based dictionary generator used a Lorentzian line-shape for the semi-solid pool. To generate a linewidth equivalent to the commonly reported super-Lorentzian of 10  $\mu$ s, a four times higher value (40  $\mu$ s) was input to the dictionary generator<sup>25</sup>.

\*\*\*A desktop computer with an Intel I9-12900F processor and 32 GB RAM was used for dictionary generation.
